# Supplementary material
Source: ML conference proceedings conference paper supplement (https://proceedings.mlr.press/v37/krichene15.html)
Supplement: Supplementary file [file krichene15-supp.pdf]

# The Hedge Algorithm on a Continuum

## Supplementary material, ICML 2015

Walid Krichene      Maximilian Balandat      Claire Tomlin  
 Alexandre Bayen

We present, for completeness, proofs which were omitted from the paper.

### 1 Proof of Lemma 4

**Lemma 4.** *If  $\psi : L^2(S) \rightarrow \mathbb{R}$  is  $\ell_\psi$ -strongly convex w.r.t.  $\|\cdot\|$ , then  $\psi^*$  is  $\frac{1}{\ell_\psi}$  smooth w.r.t.  $\|\cdot\|_*$ , that is, for all  $x, y$ ,*

$$\psi^*(x) - \psi^*(y) - \langle \nabla \psi^*(y), x - y \rangle \leq \frac{1}{2\ell_\psi} \|x - y\|_*^2$$

*Proof.* First, we prove that  $\nabla \psi^*$  is  $\frac{1}{\ell_\psi}$ -Lipschitz (see for example Nesterov [2009]).

Let  $y_1, y_2 \in E^*$ , and  $x_i = \nabla \psi^*(y_i)$ . Since  $x_i$  is the minimizer of the convex function  $x \mapsto \psi(x) - \langle y_i, x \rangle$ , we have, by first-order optimality,

$$\langle \nabla \psi(x_i) - y_i, x - x_i \rangle \geq 0 \quad \forall x \in \mathcal{X}$$

In particular, we have

$$\begin{aligned} \langle \nabla \psi(x_1) - y_1, x_2 - x_1 \rangle &\geq 0 \\ \langle \nabla \psi(x_2) - y_2, x_1 - x_2 \rangle &\geq 0 \end{aligned}$$

and summing both inequalities,

$$\langle y_2 - y_1, x_2 - x_1 \rangle \geq \langle \nabla \psi(x_2) - \nabla \psi(x_1), x_2 - x_1 \rangle$$

By strong convexity, we have

$$\langle y_2 - y_1, x_2 - x_1 \rangle = \langle \nabla \psi(x_2) - \nabla \psi(x_1), x_2 - x_1 \rangle \geq \ell_\psi \|x_2 - x_1\|^2$$

and by definition of the dual norm, we have  $\langle y_2 - y_1, x_2 - x_1 \rangle \leq \|y_2 - y_1\|_* \|x_2 - x_1\|$ . Therefore,

$$\|y_2 - y_1\|_* \|x_2 - x_1\| \geq \ell_\psi \|x_2 - x_1\|^2$$

rearranging, we have  $\|x_2 - x_1\| \leq \frac{1}{\ell_\psi} \|y_2 - y_1\|_*$ , i.e.

$$\|\nabla \psi^*(y_2) - \nabla \psi^*(y_1)\| \leq \frac{1}{\ell_\psi} \|y_2 - y_1\|_* \tag{1}$$

Finally,

$$\begin{aligned} &\psi^*(x) - \psi^*(y) - \langle \nabla \psi^*(y), x - y \rangle \\ &= \int_0^1 \langle \nabla \psi^*(y + t(x - y)) - \nabla \psi^*(y), x - y \rangle dt \\ &\leq \|y - x\|_* \int_0^1 \|\nabla \psi^*(y + t(x - y)) - \nabla \psi^*(y)\| dt \\ &\leq \|y - x\|_* \int_0^1 \frac{1}{\ell_\psi} \|y + t(x - y) - y\|_* dt && \text{by (1)} \\ &\leq \frac{1}{\ell_\psi} \|x - y\|_*^2 \int_0^1 t dt \\ &= \frac{1}{\ell_\psi} \|x - y\|_*^2 \frac{1}{2} \end{aligned}$$

□

## 2 Equivalence of Regret with respect to elements of $S$ and elements of $\mathcal{X}$

In what follows, let  $\mathcal{X} = \{f \in L^2(S) : f \geq 0 \text{ a.e. and } \int_S f(s)ds = 1\}$ . Observe that  $\mathcal{X}$  is closed: We have  $\mathcal{X} = \mathcal{X}_1 \cap \mathcal{X}_2$ , where  $\mathcal{X}_1 = \{f \in L^2(S) : f \geq 0 \text{ a.e.}\}$  and  $\mathcal{X}_2 = \{f \in L^2(S) : \int_S f(s)ds = 1\}$ .  $\mathcal{X}_1$  is clearly closed, and so is  $\mathcal{X}_2$ , being the inverse image of the closed set  $\{1\}$  under the continuous mapping  $f \mapsto \int_S f(s)ds$ .

We show the equivalence between the regret with respect to elements of the set  $S$  and regret with respect to the set of Lebesgue continuous distributions on  $S$ , as stated formally in the following:

*Suppose that the  $\ell^{(\tau)}$  are L-Lipschitz, uniformly in time, and that  $S$  is  $v$ -uniformly fat with respect to the Lebesgue uniform measure. Then*

$$\begin{aligned} R^{(t)} &= \sum_{\tau=1}^t \langle \ell^{(\tau)}, x^{(\tau)} \rangle - \min_{s \in S} \sum_{\tau=1}^t \ell^{(\tau)}(s) \\ &= \sum_{\tau=1}^t \langle \ell^{(\tau)}, x^{(\tau)} \rangle - \inf_{x \in \mathcal{X}} \left\langle \sum_{\tau=1}^t \ell^{(\tau)}(s), x \right\rangle \end{aligned}$$

*Proof.* Let  $s_t^*$  be a minimizer of  $\sum_{\tau=1}^t \ell^{(\tau)}(s)$ . Then it suffices to show that for all  $\epsilon > 0$ , there exists  $x \in \mathcal{X}$  such that

$$\left\langle \sum_{\tau=1}^t \ell^{(\tau)}, x \right\rangle \leq \sum_{\tau=1}^t \ell^{(\tau)}(s_t^*) + \epsilon$$

Fix  $\epsilon > 0$ . Since  $S$  is  $v$ -uniformly fat, there exists a convex set  $K_t \subset S$  containing  $s_t^*$ , with  $\lambda(K_t) \geq v$ . Let  $S_t$  be the homothetic transform of  $K_t$  as given in Lemma 3, of center  $s_t^*$  and ratio  $d_t$  yet to be determined. Then we have

$$\begin{aligned} D(S_t) &= d_t D(K_t) \leq d_t D(S) \\ \lambda(S_t) &= d_t^n \lambda(K_t) > 0 \end{aligned}$$

Now consider  $x = \frac{1}{\lambda(S_t)} 1_{S_t}$ . We have  $x \in \mathcal{X}$ , and since the  $\ell^{(\tau)}$  are uniformly L-Lipschitz,

$$\begin{aligned} \left\langle \sum_{\tau=1}^t \ell^{(\tau)}, x \right\rangle &= \sum_{\tau=1}^t \int_{S_t} \frac{1}{\lambda(S_t)} \ell^{(\tau)}(s) ds \\ &\leq \sum_{\tau=1}^t \int_{S_t} \frac{1}{\lambda(S_t)} (\ell^{(\tau)}(s_t^*) + L d_t D(S)) ds \\ &= t L d_t D(S) + \sum_{\tau=1}^t \ell^{(\tau)}(s_t^*) \end{aligned}$$

In particular, if we choose  $d_t = \frac{\epsilon}{t L D(S)}$ , we have  $\left\langle \sum_{\tau=1}^t \ell^{(\tau)}, x \right\rangle \leq \sum_{\tau=1}^t \ell^{(\tau)}(s_t^*) + \epsilon$ , which proves the claim. □

### 3 Proof of Proposition 1

Next, we consider the dual averaging method when the regularization functional  $\psi$  is taken to be the negative entropy

$$\psi(x) = \int_S x(s) \ln x(s) ds + \lambda(S)$$

We prove Proposition 1, which show that the solution to the dual averaging iteration is given by the Hedge update rule:

**Proposition 1.** *Let  $L^{(t)} \in E^*$ , and consider the dual averaging iteration*

$$x^{(t+1)} \in \arg \min_{x \in \mathcal{X}} \left\langle L^{(t)}, x \right\rangle + \frac{1}{\eta_{t+1}} \psi(x) \quad (2)$$

where  $\psi$  is the negative entropy. Then the solution  $x^{(t+1)}$  is given by the Hedge update rule:

$$x^{(t+1)}(s) = \frac{1}{\bar{Z}^{(t)}} e^{-\eta_{t+1} L^{(t)}(s)}$$

where  $\bar{Z}^{(t)}$  is the normalization constant  $\bar{Z}^{(t)} = \int_S e^{-\eta_{t+1} L^{(t)}(s)} ds$ .

*Proof.* Let  $K$  be the cone  $K = \{x \in L^2(S) : x \geq 0\}$ , and let

$$f(x) = \left\langle L^{(t)}, x \right\rangle + \frac{1}{\eta_{t+1}} \psi(x) + i_K(x)$$

where  $i_K$  is the indicator function of the cone  $K$ , i.e.  $i_K(s) = +\infty$  if  $s \in K$  and 0 otherwise. The dual averaging iteration is equivalent to the following problem:

$$\begin{aligned} & \text{minimize}_{x \in L^2(S)} && f(x) \\ & \text{subject to} && \langle \mathbf{1}, x \rangle = 1 \end{aligned}$$

where  $\mathbf{1} : S \rightarrow \mathbb{R}$  is identically equal to 1. Using the fact that the subdifferential of the indicator  $i_K$  is the normal cone  $N_K$  given by<sup>1</sup>

$$\forall x \in K, \partial i_K(x) = N_K(x) = \left\{ g \in L^2(S) : \sup_{y \in K} \langle g, y - x \rangle \leq 0 \right\},$$

the subdifferential of the objective function is

$$\partial f(x) = L^{(t)} + \frac{1}{\eta_{t+1}} (1 + \ln x) + N_K(x)$$

First, we show that, for all  $x$  and all  $g \in N_K(x)$ ,  $gx = 0$  almost everywhere. Indeed, fixing  $x \in K$ , we have  $\langle g, y - x \rangle \leq 0$  for all  $y \in K$ . In particular, if we consider  $y = x \left(1 + \frac{1}{2} \mathbf{1}_{g>0} - \frac{1}{2} \mathbf{1}_{g<0}\right)$ , we have

$$\langle g, y - x \rangle = \left\langle g, x \left( \frac{1}{2} \mathbf{1}_{g>0} - \frac{1}{2} \mathbf{1}_{g<0} \right) \right\rangle = \frac{1}{2} \langle |g|, x \rangle = \frac{1}{2} \int_S |g(s)| x(s) ds$$

therefore  $\frac{1}{2} \int_S |g(s)| x(s) ds \leq 0$ , which implies that  $|g|x = 0$  a.e..

Now, consider the Lagrangian  $\mathcal{L} : E \times \mathbb{R} \rightarrow \mathbb{R}$

$$\mathcal{L}(x, \nu) = \left\langle L^{(t)}, x \right\rangle + \frac{1}{\eta_{t+1}} \psi(x) + i_K(x) + \nu(\langle \mathbf{1}, x \rangle - 1)$$

Then  $(x^*, \nu^*)$  is an optimal pair only if

$$\begin{aligned} 0 & \in L^{(t)} + \frac{1}{\eta_{t+1}} (1 + \ln x^*) + N_K(x^*) + \nu \mathbf{1} \\ \langle \mathbf{1}, x^* \rangle & = 1 \end{aligned}$$

<sup>1</sup>See for example Chapter 16 in Bauschke and Combettes [2011]

see for example Bauschke and Combettes [2011] Section 19.3. We can rewrite the stationarity condition in the following way:

$$\exists g^* \in N_K(x^*) \text{ such that } L^{(t)} + \frac{1}{\eta_{t+1}}(1 + \ln x^*) + \nu \mathbf{1} + g^* = 0.$$

Therefore,

$$\begin{aligned} x^*(s) &= e^{-\eta_{t+1}L^{(t)}(s)} / e^{1+\eta_{t+1}(\nu^*+g^*(s))} \text{ a.e.} \\ g^* &\in N_K(x^*) \\ \langle \mathbf{1}, x^* \rangle &= 1 \end{aligned}$$

In particular,  $x^* > 0$  a.e., thus by the observation that  $g^*x^* = 0$  a.e., we must have  $g^* = 0$  a.e. Therefore, the necessary conditions become

$$\begin{aligned} x^*(s) &= \frac{e^{-\eta_{t+1}L^{(t)}(s)}}{\bar{Z}^{(t)}} \\ \bar{Z}^{(t)} &= e^{1+\eta_{t+1}\nu^*} \\ \frac{\int e^{-\eta_{t+1}L^{(t)}(s)} ds}{\bar{Z}^{(t)}} &= 1 \end{aligned}$$

which proves the claim. □

## References

- H. H. Bauschke and P. L. Combettes. *Convex Analysis and Monotone Operator Theory in Hilbert Spaces*. CMS Books in Mathematics. Springer, 2011.
- Yurii Nesterov. Primal-dual subgradient methods for convex problems. *Mathematical Programming*, 120(1):221–259, 2009.
